# Supplementary material for: Heterogeneity of Orientia tsutsugamushi genotypes in field-collected trombiculid mites from wild-caught small mammals in Thailand
Source: PubMed Central journal article supplement (PMC6062101; doi:10.1371/journal.pntd.0006632), 2018-07-16
Supplement: pntd.0006632.s002.pdf [file pntd.0006632.s002.pdf]

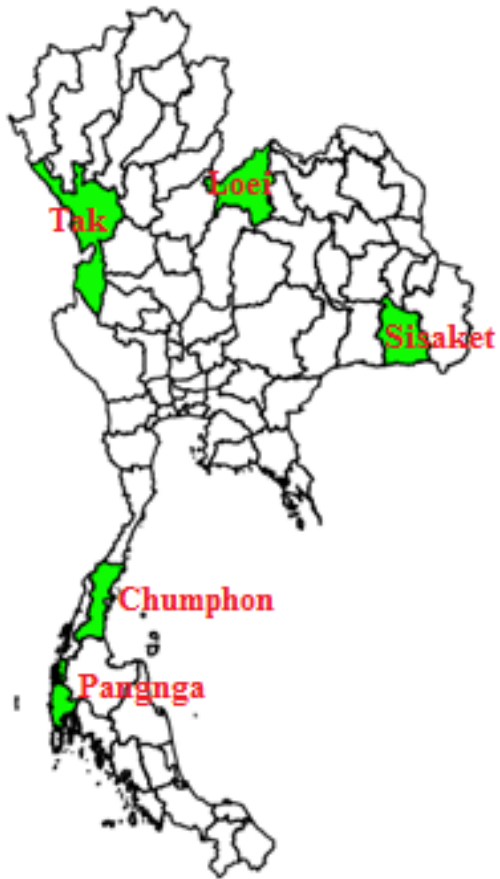

Collection sites

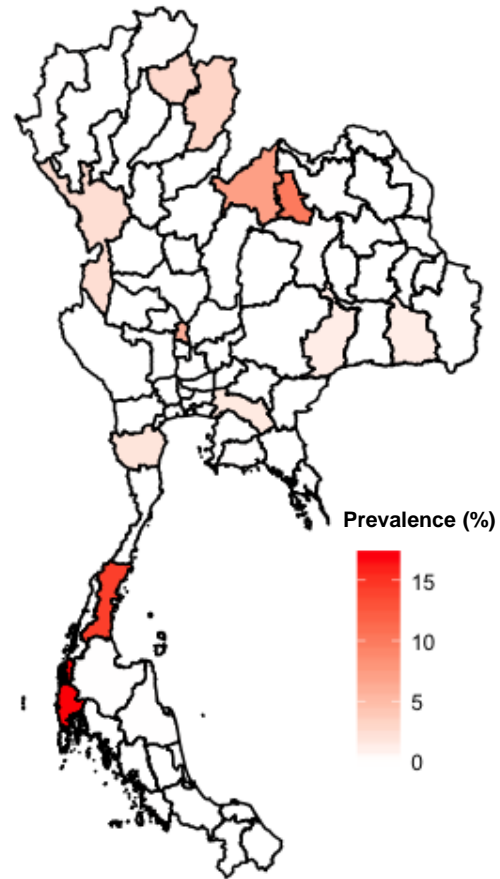

*O. tsutsugamushi* prevalence rate (%) in small mammals and chiggers
