# Supplementary material for: Heterogeneity of Orientia tsutsugamushi genotypes in field-collected trombiculid mites from wild-caught small mammals in Thailand
Source: PubMed Central journal article supplement (PMC6062101; doi:10.1371/journal.pntd.0006632), 2018-07-16
Supplement: pntd.0006632.s003.pdf [file pntd.0006632.s003.pdf]

**S1 Table. List of *Orientia tsutsugamushi* 56-kDa type-specific antigen gene reference sequences used as local references in Map Reads to Reference analysis.** Analysis was performed using CLC Genomics Workbench.

| Isolate name | Isolate host                     | Location    | Year of isolation | Accession no. | Group classified/genotype |
|--------------|----------------------------------|-------------|-------------------|---------------|---------------------------|
| Gilliam      | Human                            | Myanmar     | 2002              | DQ485289      | Gilliam                   |
| Karp         | Human                            | New Guinea  | 1943              | AY956315      | Karp/Karp C               |
| Kato         | Human                            | Japan       | 1955              | AY836148      | Kato/Kato B               |
| Kawasaki     | Human                            | Japan       | 1981              | M63383        | Gilliam/Kawasaki          |
| Kuroki       | Human                            | Japan       | 1981              | M63380        | Karp/Boryong              |
| LA-1         | <i>Leptotrombidium arenicola</i> | Malaysia    | 1993              | AF173049      | Karp/Karp A               |
| TA678        | <i>Rattus rattus</i>             | Thailand    | 1963              | U19904        | Kato/Kato B               |
| TA686        | <i>Tupaia glis</i>               | Thailand    | 1963              | U80635        | Shimokoshi                |
| TA716        | <i>Menetes berdmorei</i>         | Thailand    | 1963              | U19905        | Kato/Kato A               |
| TA763        | <i>Rattus rajah</i>              | Thailand    | 1963              | U80636        | TA763/TA763 A             |
| Taitung-4    | Human                            | Taiwan      | 2004              | AY787232      | TA763/TA763 B             |
| TW45R        | <i>Rattus losea</i>              | Taiwan      | 1999              | AY222632      | Karp/Karp A               |
| UT76         | Human                            | Thailand    | 2003              | EF213078      | Karp/Karp A               |
| UT177        | Human                            | Thailand    | 2004              | EF213084      | Karp/Karp B               |
| UT302        | Human                            | Thailand    | 2004              | EF213095      | TA763/TA763 B             |
| UT332        | Human                            | Thailand    | 2005              | EF213083      | Karp/Karp A               |
| Young-worl   | Human                            | South Korea | N/A               | AF430141      | Karp/Saitama              |
