# Supplementary material for: Heterogeneity of Orientia tsutsugamushi genotypes in field-collected trombiculid mites from wild-caught small mammals in Thailand
Source: PubMed Central journal article supplement (PMC6062101; doi:10.1371/journal.pntd.0006632), 2018-07-16
Supplement: pntd.0006632.s004.pdf [file pntd.0006632.s004.pdf]

**S2 Table. Characterization of *O. tsutsugamushi* genotypes (based on 56-kDa TSA gene, variable domains I-III) from three rodents collected from Phang Nga province by cloning. A nucleotide distance matrix was generated using “DNADist DNA Distance Matrix” in BioEdit.**

|           |                          |                  | References (% Identity) |        |        |        |            |         |                  |         |        |        |        |        |
|-----------|--------------------------|------------------|-------------------------|--------|--------|--------|------------|---------|------------------|---------|--------|--------|--------|--------|
|           |                          |                  | Karp A                  | Karp A | Karp B | Karp C | Saitama    | Boryong | Kawasaki-Gilliam | JG-C    | Kato A | Kato B | TA763A | TA763B |
| Rodent ID | Host species             | Numbers of clone | UT332                   | TW45R  | UT177  | Karp   | Youngworld | Kuroki  | Kawasaki         | Gilliam | TA716  | Kato   | TA763  | UT302  |
| DS0083    | <i>R. rattus</i> complex | 26               | 99.70                   | 87.30  | 84.60  | 85.50  | 86.80      | 80.50   | 65.60            | 71.30   | 62.00  | 62.10  | 69.10  | 59.50  |
| DS0094    | <i>R. rattus</i> complex | 30               | 99.70                   | 87.30  | 84.60  | 85.50  | 86.80      | 80.50   | 65.60            | 71.30   | 62.00  | 61.70  | 69.10  | 59.50  |
| DS0114    | <i>B. indica</i>         | 28               | 87.10                   | 99.70  | 93.00  | 93.20  | 88.40      | 89.50   | 69.20            | 75.30   | 64.80  | 68.60  | 68.00  | 62.80  |
